# Supplementary material for: A novel electrolyte additive for improving the interfacial stability of LiMn2O4 cathode lithium-ion batteries at elevated temperature
Source: Royal Society of Chemistry journal article supplement (doi:10.1039/c8ra08355j), 2018-01-01
Supplement: c8ra08355j1.pdf [file c8ra08355j1.pdf]

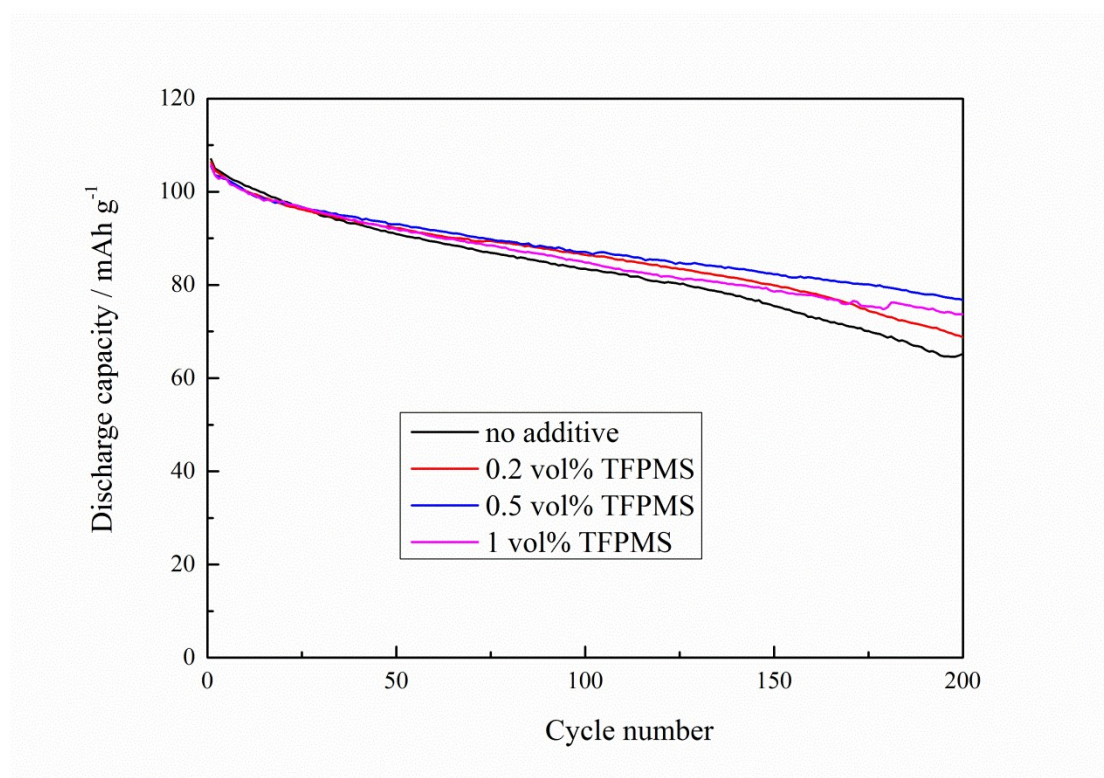

Supplementary materials .1 Cycle performance of LiMn<sub>2</sub>O<sub>4</sub>/Li cell in the electrolytes with different content of TFPMS at 55 °C. Charge-discharge rate was 1.0 C in the potential range of 3.0-4.3 V.

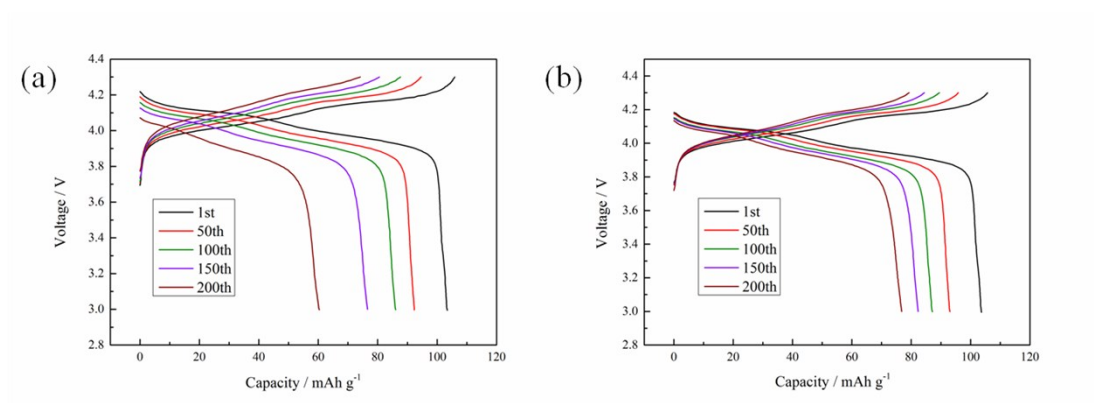

Supplementary materials .2 Charge-discharge curves of  $\text{LiMn}_2\text{O}_4/\text{Li}$  cell using 1 M  $\text{LiPF}_6$  in EC/DMC/EMC (1:1:1, wt. %) as electrolytes without additive (a) and with 0.5 vol% TFPMS (b) at 55 °C. The potential range is 3.0-4.3 V.
